# Supplementary material
Source: PubMed Central journal article supplement (PMC7855787)
Supplement: NIHMS1646755-supplement-1.pdf [file NIHMS1646755-supplement-1.pdf]

## A Online Appendix: Additional results

**Figure A.1: Disease burden in low- and middle-income countries at ages 50–69: Disability adjusted live years (DALYs) lost due to major non-communicable and communicable diseases, and injuries**

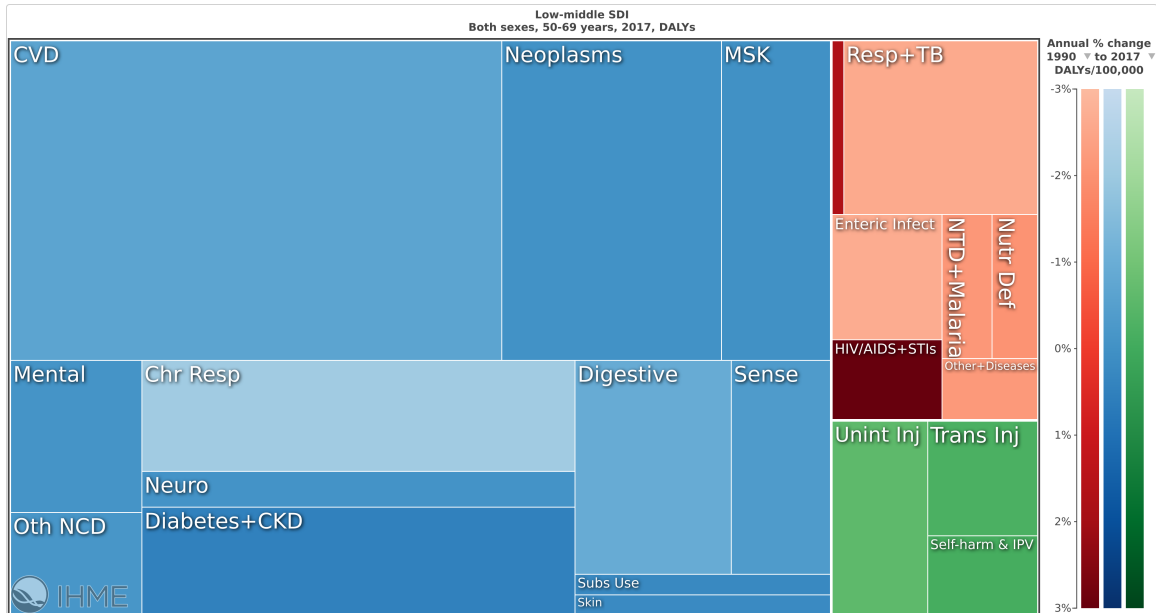

*Notes:* The area of each square is proportional to the contribution of a specific disease categories to the overall DALYs lost in a population due to mortality and morbidity. *Non-communicable diseases* (blue): CVD = Cardiovascular Diseases, Neoplasms = Neoplasms and malignant cancers, MSK = Musculoskeletal disorders, Mental = Mental disorders, Chr Resp = Chronic respiratory diseases, Neuro = Neurological disorders, Digestive = Neurological disorders, Sense = Sense organ diseases, Oth NCD = Other non-communicable diseases, Diabetes+CKD = Diabetes and kidney diseases, Subs Use = Substance use disorders, Skin = Skin and sub-cutaneous diseases. *Communicable diseases* (red): Resp+TB = Respiratory infections and tuberculosis, Enteric Infect = Enteric infections, HIV/AIDS+STIs = HIV/AIDS and sexually transmitted infections, NTD+Malaria = Neglected tropical diseases and malaria Nutr Def = Nutritional deficiencies Other + Diseases = Other infectious disease. *Injuries* (green): Unint Inj = Unintentional injuries, Trans Inj = Transport injuries Self-harm & IPV = Self-harm and interpersonal violence. The disease burden further shifts to non-communicable diseases, including CVDs, at ages 70+.

*Source:* Obtained from the Global Burden of Disease Data Visualization Tool (<https://vizhub.healthdata.org/gbd-compare/>), accessed February 25, 2020.

**Figure A.2: Disease burden in sub-Saharan African countries at ages 50–69: Disability adjusted live years (DALYs) lost due to major non-communicable and communicable diseases, and injuries**

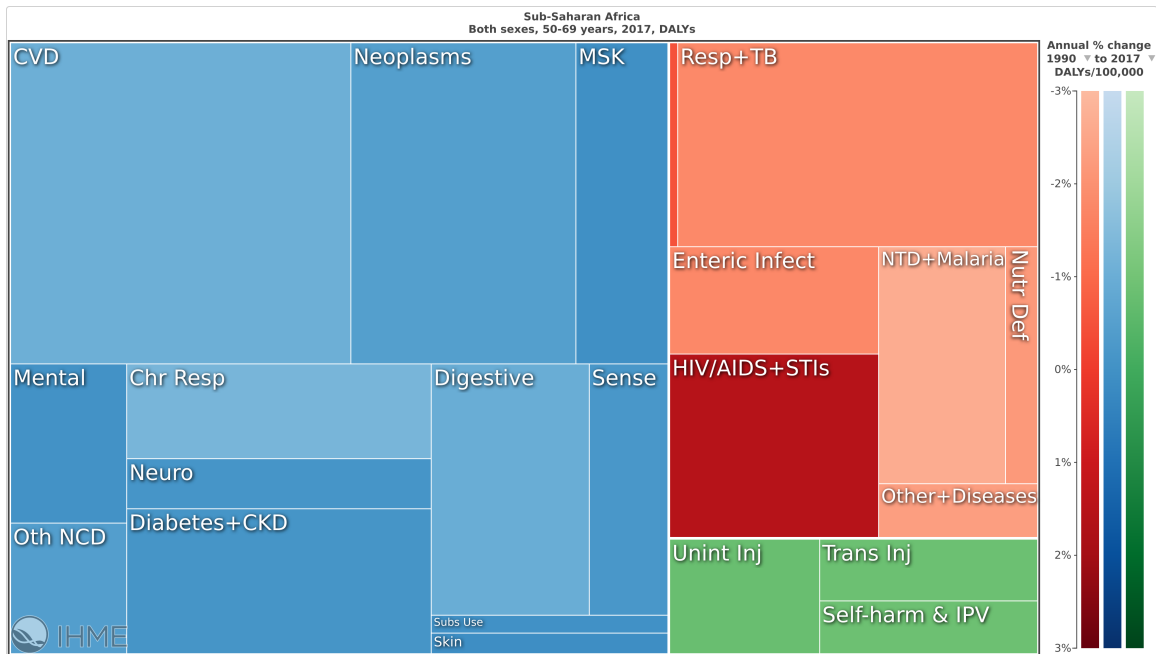

Notes: The area of each square is proportional to the contribution of a specific disease categories to the overall DALYs lost in a population due to mortality and morbidity. *Non-communicable diseases* (blue): CVD = Cardiovascular Diseases, Neoplasms = Neoplasms and malignant cancers, MSK = Musculoskeletal disorders, Mental = Mental disorders, Chr Resp = Chronic respiratory diseases, Neuro = Neurological disorders, Digestive = Neurological disorders, Sense = Sense organ diseases, Oth NCD = Other non-communicable diseases, Diabetes+CKD = Diabetes and kidney diseases, Subs Use = Substance use disorders, Skin = Skin and sub-cutaneous diseases. *Communicable diseases* (red): Resp+TB = Respiratory infections and tuberculosis, Enteric Infect = Enteric infections, HIV/AIDS+STIs = HIV/AIDS and sexually transmitted infections, NTD+Malaria = Neglected tropical diseases and malaria Nutr Def = Nutritional deficiencies Other + Diseases = Other infectious disease. *Injuries* (green): Unint Inj = Unintentional injuries, Trans Inj = Transport injuries Self-harm & IPV = Self-harm and interpersonal violence. The disease burden further shifts to non-communicable diseases, including CVDs, at ages 70+.

Source: Obtained from the Global Burden of Disease Data Visualization Tool (<https://vizhub.healthdata.org/gbd-compare/>), accessed February 25, 2020.

Figure A.3: Maximum blood pressure measurement of respondents of the 2013 MLSFH survey

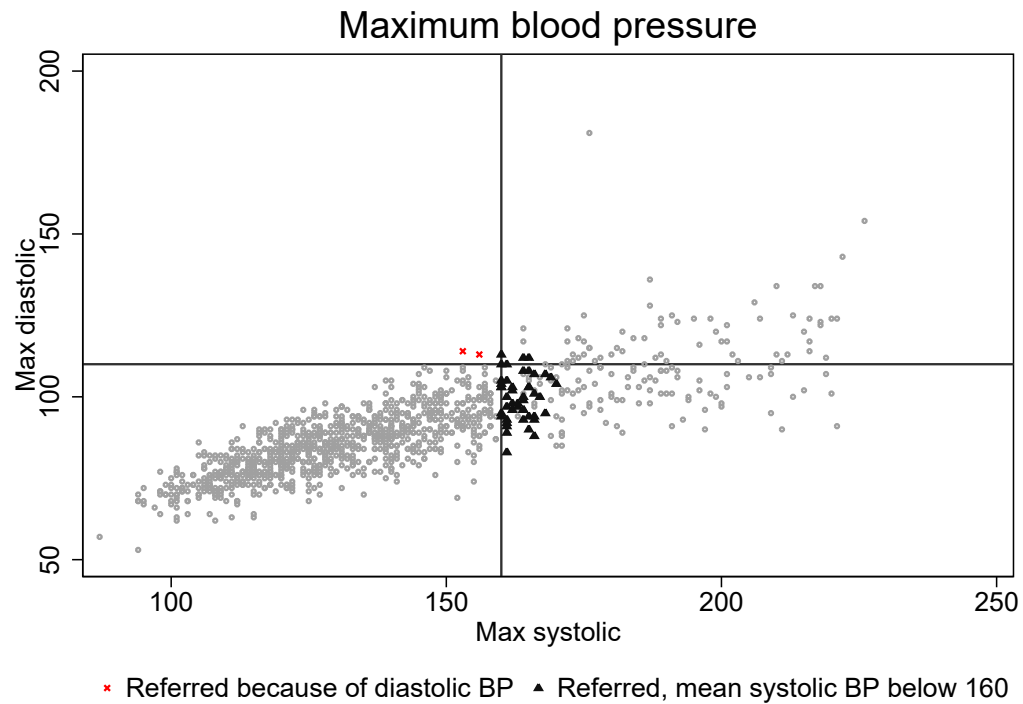

*Notes:* The graphs shows maximum of the three measures of systolic and diastolic blood pressure for respondents of the 2013 MLSFH-MAC survey. Dots represents maximum values of systolic (x-axis) and diastolic (y-axis) blood pressure. Small triangles represent individuals whose maximum systolic blood pressure is at least 160 but their mean systolic blood pressure is below 160. Small red x represent the individuals who were given a referral letter because their diastolic blood pressure is at least 110.

**Figure A.4: Variability of the predicted mean systolic blood pressure collected over the day**

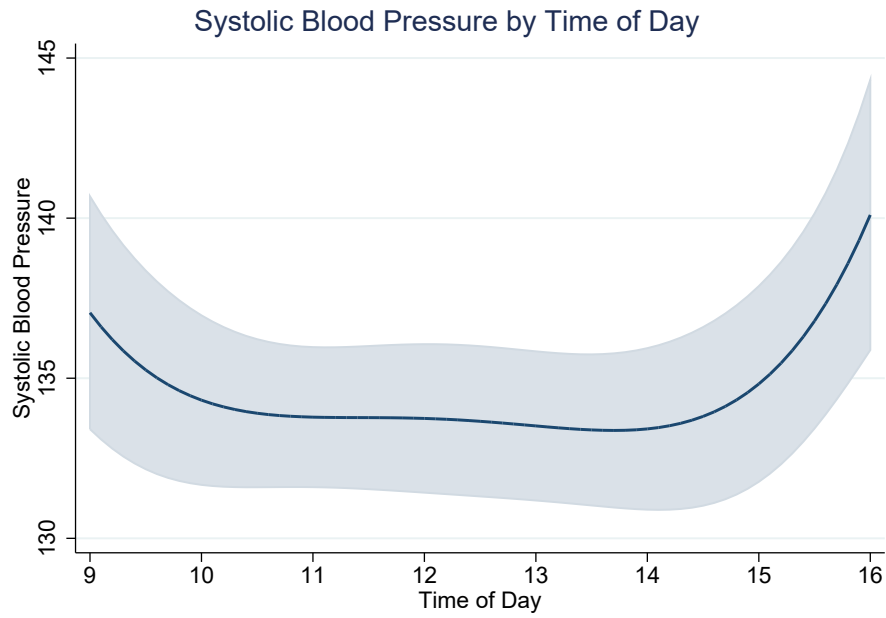

*Note:* The figure represents the marginal effects of an increase in time (hours elapsed since midnight) on mean systolic blood pressure (in 2017), along their 95% confidence intervals (grey area). The sample used to derive this graph is the same as our study sample (MLSFH-MAC respondents). The fitted values are derived from a regression that controls for sex, age and a quartic polynomial in time. Note also that we discarded a few observations for which blood pressure was collected after 4pm.

**Figure A.5: Effects of getting a referral letter on changes in systolic blood pressure (top left), changes in diastolic blood pressure (top middle), the probability of being hypertensive in 2017 (top right), hypertension diagnosis (bottom left) and hypertension medication (bottom right) at the cutoff.**

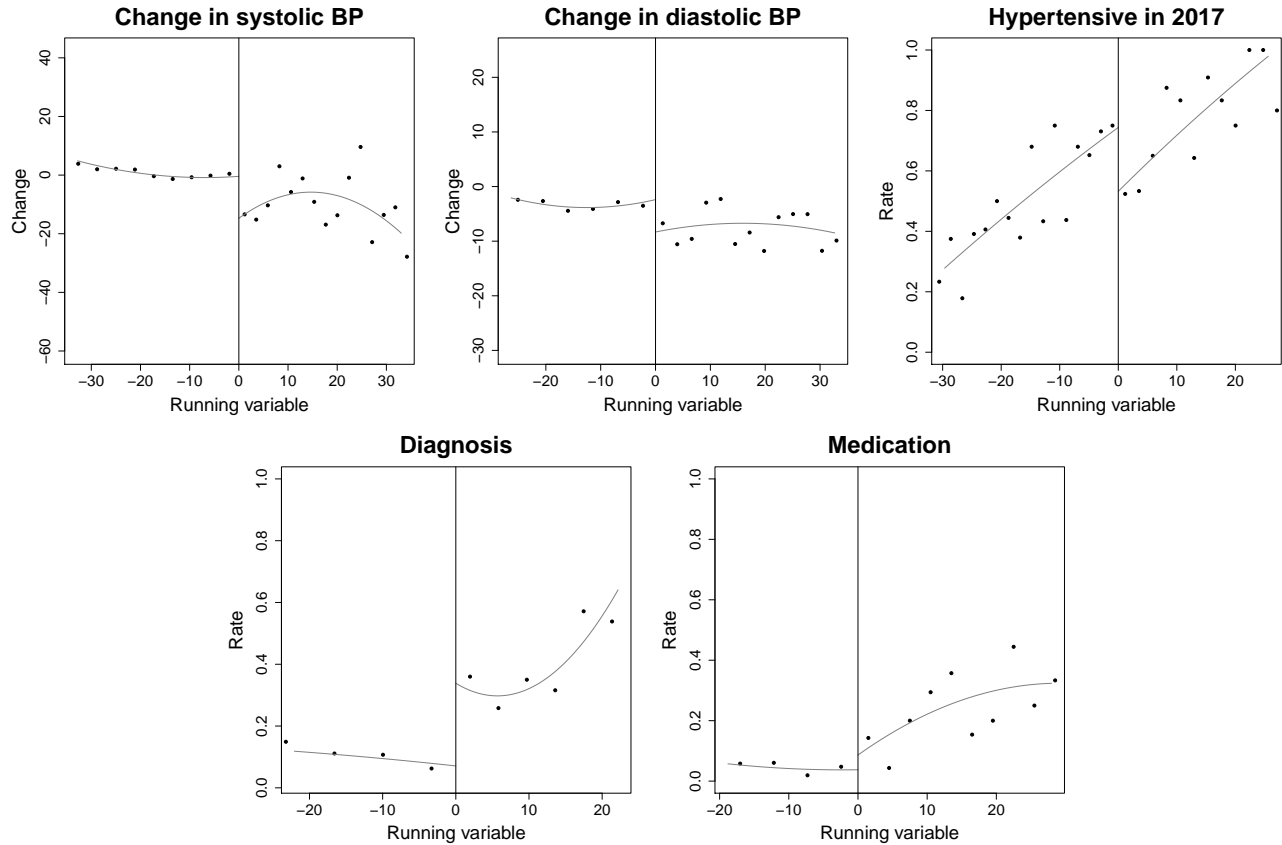

*Note:* The graphs show average blood pressure outcomes conditional on the maximum systolic blood pressure in 2013. Individuals right of the vertical line received the referral card in 2013. The outcome in the top-left graph is the average change in systolic blood pressure from 2013 to 2017. The outcome in the top-middle graph is the average change in diastolic blood pressure from 2013 to 2017. In the top-right graph, we define someone as being hypertensive if the mean systolic or diastolic blood pressure measurements was greater or equal to 140 and 90, respectively. The outcome in the bottom-left graph is whether individuals got diagnosed by a medical professional in the last two years (2017 survey). The outcome in the bottom-right graph is whether individuals are currently taking medication (2017 survey). We employed Mean Square Error (MSE) optimal bandwidth selector and generated the plots above using 2nd order local-polynomial and triangular kernels. Bins are derived optimally using variance evenly-spaced method using spacing estimators (Calonico *et al.* 2014a,b, 2015, 2017). Each dot represents the means of the respective outcome in a given bin.

**Table A.1: Results of the RDD specification using 2nd order local polynomials**

| Specifications                                      | Effects  | Std. errors | P-values | OB-   | OB+   | N-  | N+  |
|-----------------------------------------------------|----------|-------------|----------|-------|-------|-----|-----|
| <i>A. Change in systolic blood pressure</i>         |          |             |          |       |       |     |     |
| Quadratic                                           | -14.05** | 6.918       | 0.042    | 31.40 | 32.79 | 427 | 153 |
| Quadratic with controls                             | -15.06** | 7.015       | 0.032    | 26.95 | 34.31 | 343 | 154 |
| <i>B. Change in diastolic blood pressure</i>        |          |             |          |       |       |     |     |
| Quadratic                                           | -5.951*  | 3.447       | 0.084    | 27.82 | 31.82 | 364 | 150 |
| Quadratic with controls                             | -4.701   | 3.539       | 0.184    | 21.55 | 31.44 | 275 | 148 |
| <i>C. Probability of being hypertensive in 2017</i> |          |             |          |       |       |     |     |
| Quadratic                                           | -0.195   | 0.143       | 0.173    | 28.02 | 25.88 | 373 | 127 |
| Quadratic with controls                             | -0.217   | 0.139       | 0.118    | 30.87 | 25.05 | 405 | 126 |
| <i>D. Diagnosis</i>                                 |          |             |          |       |       |     |     |
| Quadratic                                           | 0.257**  | 0.129       | 0.047    | 22.27 | 21.88 | 294 | 117 |
| Quadratic with controls                             | 0.221*   | 0.123       | 0.073    | 20.95 | 24.00 | 256 | 125 |
| <i>E. Medication</i>                                |          |             |          |       |       |     |     |
| Quadratic                                           | 0.045    | 0.090       | 0.618    | 18.83 | 27.51 | 218 | 136 |
| Quadratic with controls                             | 0.038    | 0.086       | 0.655    | 18.60 | 29.10 | 214 | 142 |

Note: \*  $p < 0.1$ , \*\*  $p < 0.05$ , \*\*\*  $p < 0.01$ . All these specifications use triangular weights.  $OB-$  and  $OB+$  represent the optimal bandwidths below and above the cutoffs, respectively.  $N-$  and  $N+$  represent the number of observations included in the optimal bandwidths below and above the cutoffs, respectively. The change in systolic and diastolic blood pressure is  $mean(x_1, x_2, x_3)^{2017} - mean(x_1, x_2, x_3)^{2013}$  with  $x = \{systolic, diastolic\}$ . We use a Mean Square Error (MSE) optimal bandwidth selector.

**Table A.2: Results of the RDD specification using rectangular weights**

| Specification                                       | Effects  | Std. errors | P-values | OB-   | OB+   | N-  | N+  |
|-----------------------------------------------------|----------|-------------|----------|-------|-------|-----|-----|
| <i>A. Change in systolic blood pressure</i>         |          |             |          |       |       |     |     |
| Linear                                              | -14.79** | 5.878       | 0.012    | 21.07 | 13.37 | 280 | 87  |
| Linear with controls                                | -15.09** | 6.026       | 0.012    | 18.04 | 14.38 | 214 | 90  |
| <i>B. Change in diastolic blood pressure</i>        |          |             |          |       |       |     |     |
| Linear                                              | -7.055** | 3.119       | 0.024    | 16.57 | 12.03 | 192 | 83  |
| Linear with controls                                | -7.892** | 3.083       | 0.011    | 13.80 | 13.23 | 148 | 86  |
| <i>C. Probability of being hypertensive in 2017</i> |          |             |          |       |       |     |     |
| Linear                                              | -0.190*  | 0.110       | 0.085    | 18.82 | 16.79 | 218 | 102 |
| Linear with controls                                | -0.221** | 0.109       | 0.042    | 18.95 | 17.29 | 214 | 103 |
| <i>D. Diagnosis</i>                                 |          |             |          |       |       |     |     |
| Linear                                              | 0.256**  | 0.112       | 0.022    | 13.61 | 10.79 | 151 | 69  |
| Linear with controls                                | 0.185*   | 0.108       | 0.088    | 11.58 | 11.89 | 118 | 76  |
| <i>E. Medication</i>                                |          |             |          |       |       |     |     |
| Linear                                              | 0.061    | 0.076       | 0.425    | 18.22 | 10.71 | 218 | 69  |
| Linear with controls                                | 0.012    | 0.072       | 0.870    | 18.18 | 11.07 | 214 | 76  |

*Note:* The table shows estimates of the effect of receiving a referral card in 2013 on blood pressure related outcomes using a regression discontinuity design. Change in systolic blood pressure is the difference between the average of the three systolic blood pressure measures in 2017 and in 2013. Change in diastolic blood pressure is the difference between the average of the three diastolic blood pressure measures in 2017 and in 2013. We define someone as being hypertensive if the mean systolic or diastolic blood pressure measurements was greater or equal to 140 and 90, respectively. Diagnosis is a dummy equal to 1 if the respondent has been diagnosed by a medical professional in the last two years (2017 survey). Medication is a dummy equal to 1 if the respondent is currently taking medication for blood pressure (2017 survey). These specifications use rectangular weights instead of triangular ones.  $OB-$  and  $OB+$  represent the optimal bandwidths below and above the cutoffs, respectively.  $N-$  and  $N+$  represent the number of observations included in the optimal bandwidths below and above the cutoffs, respectively. The change in systolic and diastolic blood pressure is  $mean(x_1, x_2, x_3)^{2017} - mean(x_1, x_2, x_3)^{2013}$  with  $x = \{systolic, diastolic\}$ . We use a Mean Square Error (MSE) optimal bandwidth selector. \*  $p < 0.1$ , \*\*  $p < 0.05$ , \*\*\*  $p < 0.01$ .

**Table A.3: Results of the RDD specification restricting the bandwidth to be the same bandwidths on both sides of the cutoffs**

| Specifications                                      | Effects  | Std. errors | P-values | OB-   | OB+   | N-  | N+  |
|-----------------------------------------------------|----------|-------------|----------|-------|-------|-----|-----|
| <i>A. Change in systolic blood pressure</i>         |          |             |          |       |       |     |     |
| Linear                                              | -13.04** | 6.162       | 0.034    | 18.85 | 18.85 | 218 | 108 |
| Linear with controls                                | -14.24** | 6.039       | 0.018    | 19.04 | 19.04 | 229 | 108 |
| <i>B. Change in diastolic blood pressure</i>        |          |             |          |       |       |     |     |
| Linear                                              | -5.697*  | 2.937       | 0.052    | 19.31 | 19.31 | 233 | 109 |
| Linear with controls                                | -5.777** | 2.717       | 0.034    | 21.35 | 21.35 | 275 | 115 |
| <i>C. Probability of being hypertensive in 2017</i> |          |             |          |       |       |     |     |
| Linear                                              | -0.192*  | 0.106       | 0.070    | 23.22 | 23.22 | 312 | 122 |
| Linear with controls                                | -0.219** | 0.105       | 0.037    | 23.18 | 23.18 | 307 | 121 |
| <i>D. Diagnosis</i>                                 |          |             |          |       |       |     |     |
| Linear                                              | 0.236**  | 0.112       | 0.036    | 13.44 | 13.44 | 151 | 87  |
| Linear with controls                                | 0.201*   | 0.105       | 0.056    | 14.32 | 14.32 | 160 | 90  |
| <i>E. Medication</i>                                |          |             |          |       |       |     |     |
| Linear                                              | 0.047    | 0.077       | 0.543    | 14.30 | 14.30 | 163 | 91  |
| Linear with controls                                | 0.036    | 0.075       | 0.629    | 14.05 | 14.05 | 160 | 90  |

*Note:* The table shows estimates of the effect of receiving a referral card in 2013 on blood pressure related outcomes using a regression discontinuity design. Change in systolic blood pressure is the difference between the average of the three systolic blood pressure measures in 2017 and in 2013. Change in diastolic blood pressure is the difference between the average of the three diastolic blood pressure measures in 2017 and in 2013. We define someone as being hypertensive if the mean systolic or diastolic blood pressure measurements was greater or equal to 140 and 90, respectively. Diagnosis is a dummy equal to 1 if the respondent has been diagnosed by a medical professional in the last two years (2017 survey). Medication is a dummy equal to 1 if the respondent is currently taking medication for blood pressure (2017 survey). All these specifications use triangular weights. *OB-* and *OB+* represent the bandwidths below and above the cutoffs, respectively, and are restricted to be identical. *N-* and *N+* represent the number of observations included in the optimal bandwidths below and above the cutoffs, respectively. The change in systolic and diastolic blood pressure is  $mean(x_1, x_2, x_3)^{2017} - mean(x_1, x_2, x_3)^{2013}$  with  $x = \{systolic, diastolic\}$ . We use a Mean Square Error (MSE) optimal bandwidth selector. \*  $p < 0.1$ , \*\*  $p < 0.05$ , \*\*\*  $p < 0.01$ .



**Table A.4: Results of the RDD specification using identical optimal bandwidths for all four main outcomes**

| Specifications                                      | Effects  | Std. errors | P-values | OB-   | OB+   | N-  | N+  |
|-----------------------------------------------------|----------|-------------|----------|-------|-------|-----|-----|
| <i>A. Change in systolic blood pressure</i>         |          |             |          |       |       |     |     |
| Linear                                              | -12.88** | 5.947       | 0.030    | 23.57 | 18.43 | 312 | 108 |
| Linear with controls                                | -14.28** | 5.952       | 0.016    | 21.30 | 18.72 | 275 | 107 |
| <i>B. Change in diastolic blood pressure</i>        |          |             |          |       |       |     |     |
| Linear                                              | -5.439*  | 2.867       | 0.058    | 23.57 | 18.43 | 312 | 108 |
| Linear with controls                                | -6.029** | 2.811       | 0.032    | 21.30 | 18.72 | 275 | 107 |
| <i>C. Probability of being hypertensive in 2017</i> |          |             |          |       |       |     |     |
| Linear                                              | -0.197*  | 0.111       | 0.076    | 23.57 | 18.43 | 312 | 108 |
| Linear with controls                                | -0.228** | 0.112       | 0.042    | 21.30 | 18.76 | 275 | 107 |
| <i>D. Diagnosis</i>                                 |          |             |          |       |       |     |     |
| Linear                                              | 0.225**  | 0.094       | 0.017    | 23.57 | 18.43 | 312 | 109 |
| Linear with controls                                | 0.192**  | 0.091       | 0.035    | 21.30 | 18.72 | 275 | 108 |
| <i>E. Medication</i>                                |          |             |          |       |       |     |     |
| Linear                                              | 0.063    | 0.066       | 0.339    | 23.57 | 18.43 | 312 | 109 |
| Linear with controls                                | 0.042    | 0.064       | 0.515    | 21.30 | 18.72 | 275 | 108 |

Note: \*  $p < 0.1$ , \*\*  $p < 0.05$ , \*\*\*  $p < 0.01$ . These specifications use same optimal bandwidths for the four main outcome variables.  $OB-$  and  $OB+$  represent the optimal bandwidths below and above the cutoffs, respectively.  $N-$  and  $N+$  represent the number of observations included in the optimal bandwidths below and above the cutoffs, respectively. The change in systolic and diastolic blood pressure is  $mean(x_1, x_2, x_3)^{2017} - mean(x_1, x_2, x_3)^{2013}$  with  $x = \{systolic, diastolic\}$ . We use a Mean Square Error (MSE) optimal bandwidth selector.

**Table A.5: Results of the RDD specification using the cutoff at 157 instead of 160**

| Specifications                                      | Effects | Std. errors | P-values | OB-   | OB+   | N-  | N+  |
|-----------------------------------------------------|---------|-------------|----------|-------|-------|-----|-----|
| <i>A. Change in systolic blood pressure</i>         |         |             |          |       |       |     |     |
| Linear                                              | 3.972   | 5.271       | 0.451    | 26.32 | 10.79 | 366 | 87  |
| Linear with controls                                | 1.600   | 4.948       | 0.746    | 25.67 | 10.49 | 337 | 86  |
| <i>B. Change in diastolic blood pressure</i>        |         |             |          |       |       |     |     |
| Linear                                              | -1.773  | 2.427       | 0.465    | 18.79 | 14.18 | 250 | 107 |
| Linear with controls                                | -4.309* | 2.368       | 0.069    | 14.88 | 14.84 | 172 | 106 |
| <i>C. Probability of being hypertensive in 2017</i> |         |             |          |       |       |     |     |
| Linear                                              | 0.056   | 0.109       | 0.610    | 18.46 | 12.71 | 250 | 95  |
| Linear with controls                                | -0.003  | 0.105       | 0.980    | 20.16 | 13.12 | 277 | 98  |
| <i>D. Diagnosis</i>                                 |         |             |          |       |       |     |     |
| Linear                                              | 0.029   | 0.062       | 0.634    | 24.33 | 15.83 | 334 | 113 |
| Linear with controls                                | 0.014   | 0.062       | 0.827    | 23.26 | 16.15 | 313 | 116 |
| <i>E. Medication</i>                                |         |             |          |       |       |     |     |
| Linear                                              | 0.004   | 0.044       | 0.935    | 20.92 | 15.85 | 282 | 113 |
| Linear with controls                                | -0.020  | 0.044       | 0.643    | 19.99 | 15.52 | 259 | 112 |

*Note:* The table shows estimates of the effect of receiving a referral card in 2013 on blood pressure related outcomes using a regression discontinuity design assuming the cutoff is at 157 instead of 160. Change in systolic blood pressure is the difference between the average of the three systolic blood pressure measures in 2017 and in 2013. Change in diastolic blood pressure is the difference between the average of the three diastolic blood pressure measures in 2017 and in 2013. We define someone as being hypertensive if the mean systolic or diastolic blood pressure measurements was greater or equal to 140 and 90, respectively. Diagnosis is a dummy equal to 1 if the respondent has been diagnosed by a medical professional in the last two years (2017 survey). Medication is a dummy equal to 1 if the respondent is currently taking medication for blood pressure (2017 survey). All these specifications use triangular weights.  $OB-$  and  $OB+$  represent the bandwidths below and above the cutoffs, respectively, and are restricted to be identical.  $N-$  and  $N+$  represent the number of observations included in the optimal bandwidths below and above the cutoffs, respectively. The change in systolic and diastolic blood pressure is  $mean(x_1, x_2, x_3)^{2017} - mean(x_1, x_2, x_3)^{2013}$  with  $x = \{systolic, diastolic\}$ . We use a Mean Square Error (MSE) optimal bandwidth selector. \*  $p < 0.1$ , \*\*  $p < 0.05$ , \*\*\*  $p < 0.01$ .

**Table A.6: Results of the RDD specification using the cutoff at 163 instead of 160**

| Specifications                                      | Effects | Std. errors | P-values | OB-   | OB+   | N-  | N+  |
|-----------------------------------------------------|---------|-------------|----------|-------|-------|-----|-----|
| <i>A. Change in systolic blood pressure</i>         |         |             |          |       |       |     |     |
| Linear                                              | 2.368   | 7.274       | 0.745    | 14.45 | 18.55 | 143 | 94  |
| Linear with controls                                | 5.811   | 7.912       | 0.463    | 12.79 | 18.21 | 115 | 94  |
| <i>B. Change in diastolic blood pressure</i>        |         |             |          |       |       |     |     |
| Linear                                              | -3.758  | 3.345       | 0.261    | 18.30 | 18.41 | 198 | 94  |
| Linear with controls                                | -2.721  | 3.467       | 0.432    | 16.55 | 17.44 | 169 | 91  |
| <i>C. Probability of being hypertensive in 2017</i> |         |             |          |       |       |     |     |
| Linear                                              | 0.031   | 0.146       | 0.829    | 13.95 | 23.04 | 126 | 108 |
| Linear with controls                                | 0.141   | 0.153       | 0.357    | 11.67 | 21.44 | 110 | 103 |
| <i>D. Diagnosis</i>                                 |         |             |          |       |       |     |     |
| Linear                                              | -0.046  | 0.142       | 0.744    | 13.27 | 15.37 | 126 | 87  |
| Linear with controls                                | 0.061   | 0.136       | 0.652    | 14.05 | 13.04 | 139 | 80  |
| <i>E. Medication</i>                                |         |             |          |       |       |     |     |
| Linear                                              | -0.070  | 0.098       | 0.480    | 13.10 | 17.49 | 126 | 92  |
| Linear with controls                                | -0.037  | 0.093       | 0.691    | 13.48 | 17.21 | 124 | 92  |

*Note:* The table shows estimates of the effect of receiving a referral card in 2013 on blood pressure related outcomes using a regression discontinuity design assuming the cutoff is at 163 instead of 160. Change in systolic blood pressure is the difference between the average of the three systolic blood pressure measures in 2017 and in 2013. Change in diastolic blood pressure is the difference between the average of the three diastolic blood pressure measures in 2017 and in 2013. We define someone as being hypertensive if the mean systolic or diastolic blood pressure measurements was greater or equal to 140 and 90, respectively. Diagnosis is a dummy equal to 1 if the respondent has been diagnosed by a medical professional in the last two years (2017 survey). Medication is a dummy equal to 1 if the respondent is currently taking medication for blood pressure (2017 survey). All these specifications use triangular weights. *OB-* and *OB+* represent the bandwidths below and above the cutoffs, respectively, and are restricted to be identical. *N-* and *N+* represent the number of observations included in the optimal bandwidths below and above the cutoffs, respectively. The change in systolic and diastolic blood pressure is  $mean(x_1, x_2, x_3)^{2017} - mean(x_1, x_2, x_3)^{2013}$  with  $x = \{systolic, diastolic\}$ . We use a Mean Square Error (MSE) optimal bandwidth selector. \*  $p < 0.1$ , \*\*  $p < 0.05$ , \*\*\*  $p < 0.01$ .

**Table A.7: Results of the RDD specification on the change in physical activity and weight**

| Specification                                      | Effects | Std. errors | P-values | OB-   | OB+   | N-  | N+  |
|----------------------------------------------------|---------|-------------|----------|-------|-------|-----|-----|
| <i>A. Change weekly hours of moderate activity</i> |         |             |          |       |       |     |     |
| Linear                                             | -1.803  | 4.265       | 0.672    | 24.52 | 23.39 | 323 | 123 |
| Linear with controls                               | -1.947  | 4.331       | 0.653    | 23.33 | 22.74 | 306 | 120 |
| <i>B. Change weekly hours of vigorous activity</i> |         |             |          |       |       |     |     |
| Linear                                             | -7.931  | 4.900       | 0.106    | 11.16 | 14.52 | 119 | 90  |
| Linear with controls                               | -8.973* | 4.907       | 0.067    | 10.91 | 14.75 | 102 | 89  |
| <i>C. Change in weight</i>                         |         |             |          |       |       |     |     |
| Linear                                             | 0.143   | 1.529       | 0.925    | 19.95 | 13.36 | 223 | 85  |
| Linear with controls                               | -0.048  | 1.530       | 0.975    | 19.79 | 13.94 | 223 | 85  |
| <i>D. Change in BMI</i>                            |         |             |          |       |       |     |     |
| Linear                                             | -0.401  | 0.588       | 0.495    | 18.52 | 14.22 | 209 | 88  |
| Linear with controls                               | -0.519  | 0.619       | 0.402    | 17.69 | 13.66 | 197 | 84  |
| <i>E. Waist to hip ratio (2017)</i>                |         |             |          |       |       |     |     |
| Linear                                             | -0.017  | 0.016       | 0.298    | 19.17 | 19.39 | 226 | 108 |
| Linear with controls                               | -0.025  | 0.016       | 0.123    | 19.87 | 19.56 | 224 | 107 |

Note: \*  $p < 0.1$ , \*\*  $p < 0.05$ , \*\*\*  $p < 0.01$ . All these specification use triangular weights.  $OB-$  and  $OB+$  represent the optimal bandwidths below and above the cutoffs, respectively.  $N-$  and  $N+$  represent the number of observations included in the optimal bandwidths below and above the cutoffs, respectively. The change in systolic and diastolic blood pressure is  $mean(x_1, x_2, x_3)^{2017} - mean(x_1, x_2, x_3)^{2013}$  with  $x = \{systolic, diastolic\}$ . We use a Mean Square Error (MSE) optimal bandwidth selector.

**Table A.8: Causal effects on mortality and attrition**

| <b>1. Regression Discontinuity Design</b> |         |             |          |       |                  |     |     |
|-------------------------------------------|---------|-------------|----------|-------|------------------|-----|-----|
|                                           | Effects | Std. errors | P-values | OB-   | OB+              | N-  | N+  |
| <i><b>A. Mortality</b></i>                |         |             |          |       |                  |     |     |
| Linear                                    | 0.019   | 0.082       | 0.814    | 18.37 | 14.92            | 252 | 106 |
| Linear with controls                      | 0.057   | 0.078       | 0.466    | 21.09 | 14.59            | 318 | 106 |
| <i><b>B. Attrition</b></i>                |         |             |          |       |                  |     |     |
| Linear                                    | 0.000   | 0.045       | 0.996    | 31.67 | 17.30            | 445 | 106 |
| Linear with controls                      | 0.010   | 0.044       | 0.817    | 29.77 | 16.71            | 414 | 104 |
| <b>2. Matching Strategy</b>               |         |             |          |       |                  |     |     |
|                                           | ATET    | P-value     |          | Obs.  | Average distance |     |     |
| <i><b>A. Mortality</b></i>                |         |             |          |       |                  |     |     |
| No controls                               | .013    | .936        |          | 242   | .871             |     |     |
| With controls                             | -.033   | .593        |          | 242   | .916             |     |     |
| With controls + SD                        | -.009   | .883        |          | 242   | 1.538            |     |     |
| <i><b>B. Attrition</b></i>                |         |             |          |       |                  |     |     |
| No controls                               | .010    | .666        |          | 218   | .920             |     |     |
| With controls                             | .015    | .710        |          | 218   | .959             |     |     |
| With controls + SD                        | -.039   | .334        |          | 218   | 1.575            |     |     |

*Note:* The table shows the effect of the referral card given in 2013 on mortality and attrition in 2017. Specifications in the RDD use triangular weights.  $OB-$  and  $OB+$  represent the optimal bandwidths below and above the cutoffs, respectively.  $N-$  and  $N+$  represent the number of observations included in the optimal bandwidths below and above the cutoffs, respectively. We use a Mean Square Error (MSE) optimal bandwidth selector. \*  $p < 0.1$ , \*\*  $p < 0.05$ , \*\*\*  $p < 0.01$ .

**Table A.9: Results of the matching estimations on the main outcomes variables with different restrictions on the number of minimum matches**

|                              | Change in<br>systolic<br>blood<br>pressure | Change in<br>diastolic<br>blood<br>pressure | Prob. of<br>being hy-<br>pertensive<br>(2017) | Diagnosis | Medication |
|------------------------------|--------------------------------------------|---------------------------------------------|-----------------------------------------------|-----------|------------|
| <b>A. At least 3 matches</b> |                                            |                                             |                                               |           |            |
| <i>No controls</i>           |                                            |                                             |                                               |           |            |
| ATET                         | -3.867                                     | -1.316                                      | -.113                                         | .272***   | .112**     |
| P-value                      | .685                                       | .690                                        | .313                                          | .000      | .032       |
| Obs.                         | 207                                        | 207                                         | 207                                           | 207       | 207        |
| Average distance             | .933                                       | .933                                        | .933                                          | .933      | .933       |
| <i>With controls</i>         |                                            |                                             |                                               |           |            |
| ATET                         | -9.471*                                    | -1.628                                      | -.078                                         | .292***   | .135***    |
| P-value                      | .089                                       | .500                                        | .439                                          | .000      | .009       |
| Obs.                         | 204                                        | 204                                         | 204                                           | 204       | 204        |
| Average distance             | .904                                       | .904                                        | .904                                          | .904      | .904       |
| <i>With controls + SD</i>    |                                            |                                             |                                               |           |            |
| ATET                         | -6.418                                     | -2.750                                      | -.290***                                      | .257***   | .162***    |
| P-value                      | .271                                       | .272                                        | .002                                          | .002      | .003       |
| Obs.                         | 204                                        | 204                                         | 204                                           | 204       | 204        |
| Average distance             | 1.503                                      | 1.503                                       | 1.503                                         | 1.503     | 1.503      |
| <b>B. At least 5 matches</b> |                                            |                                             |                                               |           |            |
| <i>No controls</i>           |                                            |                                             |                                               |           |            |
| ATET                         | -8.164                                     | -2.622                                      | -.204                                         | .289***   | .123**     |
| P-value                      | .293                                       | .375                                        | .178                                          | .000      | .0150      |
| Obs.                         | 207                                        | 207                                         | 207                                           | 207       | 207        |
| Average distance             | 1.228                                      | 1.228                                       | 1.228                                         | 1.228     | 1.228      |
| <i>With controls</i>         |                                            |                                             |                                               |           |            |
| ATET                         | -10.39*                                    | -2.416                                      | -.126                                         | .223***   | .128**     |
| P-value                      | .051                                       | .304                                        | .197                                          | .005      | .018       |
| Obs.                         | 204                                        | 204                                         | 204                                           | 204       | 204        |
| Average distance             | 1.057                                      | 1.057                                       | 1.057                                         | 1.057     | 1.057      |
| <i>With controls + SD</i>    |                                            |                                             |                                               |           |            |
| ATET                         | -12.18**                                   | -4.995**                                    | -.226**                                       | .235***   | .171***    |
| P-value                      | .028                                       | .040                                        | .021                                          | .004      | .002       |
| Obs.                         | 204                                        | 204                                         | 204                                           | 204       | 204        |
| Average distance             | 1.665                                      | 1.665                                       | 1.665                                         | 1.665     | 1.665      |

Note: \*  $p < 0.1$ , \*\*  $p < 0.05$ , \*\*\*  $p < 0.01$ . The results represent the Average Treatment Effects on Treated (ATET) of getting a referral card on the various outcomes listed in the columns. We restrict the number of matches to be at least 3 (Panel A) and 5 (Panel B) and match respondents based on their mean systolic blood pressure in 2013, limiting the distance for possible matches to be at most 10. "Distance" represent the mean of the average distances between each observation and their matches. "With controls" includes a sex dummy, age and region dummies.

**Table A.10: Results of the matching estimations on the main outcomes variables, re-stricting possible matches to be within a distance of 12 maximum**

|                           | Change in<br>systolic<br>blood<br>pressure | Change in<br>diastolic<br>blood<br>pressure | Prob. of<br>being hy-<br>pertensive<br>(2017) | Diagnosis | Medication |
|---------------------------|--------------------------------------------|---------------------------------------------|-----------------------------------------------|-----------|------------|
| <i>No controls</i>        |                                            |                                             |                                               |           |            |
| ATET                      | -8.484                                     | -2.817                                      | -.196                                         | .277***   | .117**     |
| P-value                   | .321                                       | .365                                        | .171                                          | .000      | .023       |
| Obs.                      | 237                                        | 237                                         | 237                                           | 237       | 237        |
| Average distance          | 1.21                                       | 1.21                                        | 1.21                                          | 1.21      | 1.21       |
| <i>With controls</i>      |                                            |                                             |                                               |           |            |
| ATET                      | -9.734*                                    | -2.087                                      | -.112                                         | .228***   | .128**     |
| P-value                   | .079                                       | .391                                        | .26                                           | .003      | .012       |
| Obs.                      | 234                                        | 234                                         | 234                                           | 234       | 234        |
| Average distance          | .935                                       | .935                                        | .935                                          | .935      | .935       |
| <i>With controls + SD</i> |                                            |                                             |                                               |           |            |
| ATET                      | -9.01*                                     | -4.027*                                     | -.215**                                       | .258***   | .180***    |
| P-value                   | .098                                       | .093                                        | .024                                          | .002      | .001       |
| Obs.                      | 234                                        | 234                                         | 234                                           | 234       | 234        |
| Average distance          | 1.54                                       | 1.54                                        | 1.54                                          | 1.54      | 1.54       |

Note: \*  $p < 0.1$ , \*\*  $p < 0.05$ , \*\*\*  $p < 0.01$ . The results represent the Average Treatment Effects on Treated (ATET) of getting a referral card on the various outcomes listed in the columns. We restrict the number of matches to be at least 4 and match respondents based on their mean systolic blood pressure in 2013, limiting the distance for possible matches to be at most 8. "Distance" represent the mean of the average distances between each observation and their matches. "With controls" includes a sex dummy, age and region dummies.

**Table A.11: Results of the matching estimations on the main outcomes variables, restricting possible matches to be within a distance of 8 maximum**

|                           | Change in<br>systolic<br>blood<br>pressure | Change in<br>diastolic<br>blood<br>pressure | Prob. of<br>being hy-<br>pertensive<br>(2017) | Diagnosis | Medication |
|---------------------------|--------------------------------------------|---------------------------------------------|-----------------------------------------------|-----------|------------|
| <i>No controls</i>        |                                            |                                             |                                               |           |            |
| ATET                      | -8.484                                     | -2.817                                      | -.196                                         | .277***   | .117**     |
| P-value                   | .321                                       | .365                                        | .171                                          | .000      | .023       |
| Obs.                      | 181                                        | 181                                         | 181                                           | 181       | 181        |
| Average distance          | 1.21                                       | 1.21                                        | 1.21                                          | 1.21      | 1.21       |
| <i>With controls</i>      |                                            |                                             |                                               |           |            |
| ATET                      | -9.046                                     | -1.769                                      | -.100                                         | .215***   | .118**     |
| P-value                   | .101                                       | .463                                        | .309                                          | .008      | .026       |
| Obs.                      | 178                                        | 178                                         | 178                                           | 178       | 178        |
| Average distance          | 1.055                                      | 1.055                                       | 1.055                                         | 1.055     | 1.055      |
| <i>With controls + SD</i> |                                            |                                             |                                               |           |            |
| ATET                      | -7.386                                     | -2.029                                      | -.266***                                      | .199**    | .093*      |
| P-value                   | .206                                       | .404                                        | .006                                          | .015      | .077       |
| Obs.                      | 178                                        | 178                                         | 178                                           | 178       | 178        |
| Average distance          | 1.659                                      | 1.659                                       | 1.659                                         | 1.659     | 1.659      |

Note: \*  $p < 0.1$ , \*\*  $p < 0.05$ , \*\*\*  $p < 0.01$ . The results represent the Average Treatment Effects on Treated (ATET) of getting a referral card on the various outcomes listed in the columns. We restrict the number of matches to be at least 4 and match respondents based on their mean systolic blood pressure in 2013, limiting the distance for possible matches to be at most 8. "Distance" represent the mean of the average distances between each observation and their matches. "With controls" includes a sex dummy, age and region dummies.



**Table A.12: Results of the matching estimations on the main outcomes variables, restricting possible matches to be within a distance of 5 maximum**

|                           | Change in<br>systolic<br>blood<br>pressure | Change in<br>diastolic<br>blood<br>pressure | Prob. of<br>being hy-<br>pertensive<br>(2017) | Diagnosis | Medication |
|---------------------------|--------------------------------------------|---------------------------------------------|-----------------------------------------------|-----------|------------|
| <i>No controls</i>        |                                            |                                             |                                               |           |            |
| ATET                      | -9.440                                     | -2.960                                      | -.216                                         | .253***   | .079*      |
| P-value                   | .299                                       | .367                                        | .156                                          | .001      | .089       |
| Obs.                      | 106                                        | 106                                         | 106                                           | 106       | 106        |
| Average distance          | 1.275                                      | 1.275                                       | 1.275                                         | 1.275     | 1.275      |
| <i>With controls</i>      |                                            |                                             |                                               |           |            |
| ATET                      | -6.068                                     | -.024                                       | -.049                                         | .260***   | .115**     |
| P-value                   | .301                                       | .992                                        | .648                                          | .003      | .0250      |
| Obs.                      | 105                                        | 105                                         | 105                                           | 105       | 105        |
| Average distance          | 1.38                                       | 1.38                                        | 1.38                                          | 1.38      | 1.38       |
| <i>With controls + SD</i> |                                            |                                             |                                               |           |            |
| ATET                      | -10.66*                                    | -2.107                                      | -.313***                                      | .234***   | .120**     |
| P-value                   | .057                                       | .401                                        | .001                                          | .0090     | .023       |
| Obs.                      | 105                                        | 105                                         | 105                                           | 105       | 105        |
| Average distance          | 1.978                                      | 1.978                                       | 1.978                                         | 1.978     | 1.978      |

Note: \*  $p < 0.1$ , \*\*  $p < 0.05$ , \*\*\*  $p < 0.01$ . The results represent the Average Treatment Effects on Treated (ATET) of getting a referral card on the various outcomes listed in the columns. We restrict the number of matches to be at least 4 and match respondents based on their mean systolic blood pressure in 2013, limiting the distance for possible matches to be at most 5. "Distance" represent the mean of the average distances between each observation and their matches. "With controls" includes a sex dummy, age and region dummies.

**Table A.13: Results of the matching estimations on the main outcomes variables, matching observations based on their median systolic blood pressure value instead of mean**

|                           | Change in<br>systolic<br>blood<br>pressure | Change in<br>diastolic<br>blood<br>pressure | Prob. of<br>being hy-<br>pertensive<br>(2017) | Diagnosis | Medication |
|---------------------------|--------------------------------------------|---------------------------------------------|-----------------------------------------------|-----------|------------|
| <i>No controls</i>        |                                            |                                             |                                               |           |            |
| ATET                      | -6.109                                     | -3.058                                      | -.121                                         | .289***   | .119**     |
| P-value                   | .325                                       | .223                                        | .161                                          | .000      | .027       |
| Obs.                      | 256                                        | 256                                         | 256                                           | 257       | 257        |
| Average distance          | .726                                       | .726                                        | .726                                          | .773      | .773       |
| <i>With controls</i>      |                                            |                                             |                                               |           |            |
| ATET                      | -9.530*                                    | -3.590                                      | -.087                                         | .209**    | .095*      |
| P-value                   | .087                                       | .119                                        | .343                                          | .011      | .096       |
| Obs.                      | 253                                        | 253                                         | 253                                           | 254       | 254        |
| Average distance          | .797                                       | .797                                        | .796                                          | .796      | .796       |
| <i>With controls + SD</i> |                                            |                                             |                                               |           |            |
| ATET                      | -8.729                                     | -6.783***                                   | -.163*                                        | .195**    | .102*      |
| P-value                   | .125                                       | .003                                        | .078                                          | .016      | .077       |
| Obs.                      | 253                                        | 253                                         | 253                                           | 254       | 254        |
| Average distance          | 1.34                                       | 1.34                                        | 1.34                                          | 1.34      | 1.34       |

Note: \*  $p < 0.1$ , \*\*  $p < 0.05$ , \*\*\*  $p < 0.01$ . The results represent the Average Treatment Effects on Treated (ATET) of getting a referral card on the various outcomes listed in the columns. We restrict the number of matches to be at least 4 and match respondents based on their median systolic blood pressure in 2013, limiting the distance for possible matches to be at most 10. "Distance" represent the mean of the average distances between each observation and their matches. "With controls" includes a sex dummy, age and region dummies.

**Table A.14: Results of the matching estimations on the main outcome variables, using the last two measurements only**

|                           | Change in<br>systolic<br>blood<br>pressure | Change in<br>diastolic<br>blood<br>pressure | Prob. of<br>being hy-<br>pertensive<br>(2017) | Diagnosis | Medication |
|---------------------------|--------------------------------------------|---------------------------------------------|-----------------------------------------------|-----------|------------|
| <i>No controls</i>        |                                            |                                             |                                               |           |            |
| ATET                      | -8.681                                     | -2.590                                      | -.180                                         | .278***   | .107**     |
| P-value                   | .131                                       | .273                                        | .101                                          | .000      | .027       |
| Obs.                      | 232                                        | 232                                         | 232                                           | 232       | 232        |
| Average distance          | .800                                       | .800                                        | .800                                          | .800      | .800       |
| <i>With controls</i>      |                                            |                                             |                                               |           |            |
| ATET                      | -9.586*                                    | -1.471                                      | -.171*                                        | .244***   | .086*      |
| P-value                   | .083                                       | .540                                        | .076                                          | .001      | .093       |
| Obs.                      | 228                                        | 228                                         | 228                                           | 228       | 228        |
| Average distance          | .909                                       | .909                                        | .909                                          | .909      | .909       |
| <i>With controls + SD</i> |                                            |                                             |                                               |           |            |
| ATET                      | -11.13**                                   | -2.460                                      | -.148                                         | .224***   | .084       |
| P-value                   | .033                                       | .268                                        | .128                                          | .006      | .135       |
| Obs.                      | 228                                        | 228                                         | 228                                           | 228       | 228        |
| Average distance          | 1.338                                      | 1.338                                       | 1.338                                         | 1.338     | 1.338      |

*Note:* \*  $p < 0.1$ , \*\*  $p < 0.05$ , \*\*\*  $p < 0.01$ . The results represent the Average Treatment Effects on Treated (ATET) of getting a referral card on the various outcomes listed in the columns. We restrict the number of matches to be at least 4 and match respondents based on their median systolic blood pressure in 2013, limiting the distance for possible matches to be at most 10. "Distance" represent the mean of the average distances between each observation and their matches. "With controls" includes a sex dummy, age and region dummies. Here, we are taking into account only the last two measurements to compute the mean systolic blood pressure.

**Table A.15: Results of the matching estimations representing the Average Treatment Effects (ATE)**

|                           | Change in<br>systolic<br>blood<br>pressure | Change in<br>diastolic<br>blood<br>pressure | Prob. of<br>being hy-<br>pertensive<br>(2017) | Diagnosis | Medication |
|---------------------------|--------------------------------------------|---------------------------------------------|-----------------------------------------------|-----------|------------|
| <i>No controls</i>        |                                            |                                             |                                               |           |            |
| ATE                       | -2.798                                     | -1.901                                      | -.024                                         | .454***   | .249*      |
| P-value                   | .751                                       | .671                                        | .883                                          | .003      | .071       |
| Obs.                      | 207                                        | 207                                         | 207                                           | 207       | 207        |
| Average distance          | 1.21                                       | 1.21                                        | 1.21                                          | 1.21      | 1.21       |
| <i>With controls</i>      |                                            |                                             |                                               |           |            |
| ATE                       | -3.637                                     | -2.652                                      | -.001                                         | .351***   | .205***    |
| P-value                   | .484                                       | .278                                        | .989                                          | .000      | .002       |
| Obs.                      | 204                                        | 204                                         | 204                                           | 204       | 204        |
| Average distance          | .984                                       | .984                                        | .984                                          | .984      | .984       |
| <i>With controls + SD</i> |                                            |                                             |                                               |           |            |
| ATE                       | -18.94***                                  | -5.890***                                   | .014                                          | .372***   | -.005      |
| P-value                   | .000                                       | .007                                        | .885                                          | .000      | .9354      |
| Obs.                      | 204                                        | 204                                         | 204                                           | 204       | 204        |
| Average distance          | 1.59                                       | 1.59                                        | 1.59                                          | 1.59      | 1.59       |

Note: \*  $p < 0.1$ , \*\*  $p < 0.05$ , \*\*\*  $p < 0.01$ . The results represent the Average Treatment Effects (ATE) of getting a referral card on the various outcomes listed in the columns. We restrict the number of matches to be at least 4 and match respondents based on their mean systolic blood pressure in 2013, limiting the distance for possible matches to be at most 10. "Distance" represent the mean of the average distances between each observation and their matches. "With controls" includes a sex dummy, age and region dummies.

**Table A.16: Results of the matching estimations on the change in physical activity and weight**

|                           | Change weekly hours of moderate activity | Change weekly hours of vigorous activity | Change in weight | Change in BMI | Waist to hip ratio (2017) |
|---------------------------|------------------------------------------|------------------------------------------|------------------|---------------|---------------------------|
| <i>No controls</i>        |                                          |                                          |                  |               |                           |
| ATET                      | 3.790                                    | -7.585**                                 | -2.305           | -1.073        | -.033                     |
| P-value                   | .370                                     | .023                                     | .464             | .264          | .160                      |
| Obs.                      | 206                                      | 204                                      | 200              | 200           | 202                       |
| Average distance          | 1.21                                     | 1.234                                    | 1.211            | 1.211         | 1.204                     |
| <i>With controls</i>      |                                          |                                          |                  |               |                           |
| ATET                      | 4.354                                    | -12.42***                                | -.061            | -.048         | -.034                     |
| P-value                   | .261                                     | .001                                     | .953             | .926          | .108                      |
| Obs.                      | 204                                      | 202                                      | 200              | 200           | 201                       |
| Average distance          | .984                                     | .995                                     | 1.003            | 1.003         | .998                      |
| <i>With controls + SD</i> |                                          |                                          |                  |               |                           |
| ATET                      | -22.54***                                | -5.302                                   | -1.446           | -.134         | .015                      |
| P-value                   | .000                                     | .109                                     | .139             | .765          | .348                      |
| Obs.                      | 204                                      | 202                                      | 200              | 200           | 201                       |
| Average distance          | 1.59                                     | 1.594                                    | 1.613            | 1.613         | 1.612                     |

Note: \*  $p < 0.1$ , \*\*  $p < 0.05$ , \*\*\*  $p < 0.01$ . The results represent the Average Treatment Effects on Treated (ATET) of getting a referral card on the various outcomes listed in the columns. We restrict the number of matches to be at least 4 and match respondents based on their median systolic blood pressure in 2013, limiting the distance for possible matches to be at most 10. "Distance" represent the mean of the average distances between each observation and their matches. "With controls" includes a sex dummy, age and region dummies.
